# 3-Hydroxykynurenine and clinical symptoms in first-episode neuroleptic-naïve patients with schizophrenia

Ruth Condray<sup>1,2</sup>, George G. Dougherty Jr.<sup>1,2</sup>, Matcheri S. Keshavan<sup>2,3</sup>, Ravinder D. Reddy<sup>1,2</sup>, Gretchen L. Haas<sup>1,2</sup>, Debra M. Montrose<sup>2</sup>, Wayne R. Matson<sup>4</sup>, Joseph McEvoy<sup>5,6</sup>, Rima Kaddurah-Daouk<sup>6</sup> and Jeffrey K. Yao<sup>1,2,7</sup>

<sup>1</sup> VA Pittsburgh Healthcare System, Medical Research Service, Pittsburgh, PA, USA

<sup>2</sup> University of Pittsburgh Medical Center, Department of Psychiatry, Pittsburgh, PA, USA

<sup>3</sup> Beth Israel Deaconess Medical Center and Harvard University, Department of Psychiatry, Boston, MA, USA

<sup>4</sup> Bedford VA Medical Center, Medical Research Service, Bedford, MA, USA

<sup>5</sup> John Umstead Hospital, Department of Psychiatry, Butner, NC, USA

<sup>6</sup> Department of Psychiatry and Behavioral Sciences, Duke University, Durham, NC, USA

<sup>7</sup> University of Pittsburgh School of Pharmacy, Department of Pharmaceutical Sciences, Pittsburgh, PA, USA

## Abstract

One branch of the tryptophan catabolic cascade is the kynurenine pathway, which produces neurotoxic [3-hydroxykynurenine (3-OHKY), quinolinic acid] and neuroinhibitory (kynurenic acid) compounds. Kynurenic acid acts as a competitive antagonist at the glycine site of *N*-methyl-D-aspartate receptors at high concentrations and as a non-competitive antagonist on the  $\alpha_7$ -nicotinic acetylcholine receptor at low concentrations. Kynurenine compounds also influence cognitive functions known to be disrupted in schizophrenia. Alterations in tryptophan metabolism are therefore of potential significance for the pathophysiology of this disorder. In this paper, tryptophan metabolites were measured from plasma using high-pressure liquid chromatography coupled with electrochemical coulometric array detection, and relationships were tested between these metabolic signatures and clinical symptoms for 25 first-episode neuroleptic-naïve schizophrenia patients. Blood samples were collected and clinical and neurological symptoms were rated at baseline and again at 4 wk following initiation of treatment. Level of 3-OHKY and total clinical symptom scores were correlated when patients were unmedicated and neuroleptic-naïve, and this relationship differed significantly from the correlation observed for patients 4 wk after beginning treatment. Baseline psychosis symptoms were predicted only by neurological symptoms. Moreover, baseline 3-OHKY predicted clinical change at 4 wk, with the lowest concentrations of 3-OHKY being associated with the greatest improvement in symptoms. Taken together, our findings suggest a neurotoxic product of tryptophan metabolism, 3-OHKY, predicts severity of clinical symptoms during the early phase of illness and before exposure to antipsychotic drugs. Baseline level of 3-OHKY may also predict the degree of clinical improvement following brief treatment with antipsychotics.

Received 21 September 2010; Reviewed 10 November 2010; Revised 1 December 2010; Accepted 21 December 2010;  
First published online 28 January 2011

**Key words:** Cognition, first-episode psychosis, 3-hydroxykynurenine, neuroleptic-naïve, neurological symptoms, schizophrenia, tryptophan.

## Introduction

Schizophrenia is associated with a wide range of biological and behavioural perturbations and compromises to social and life functioning. The

pathophysiology underlying these diverse disturbances has not been confirmed as either a single, fundamental pathology or, conversely, multiple abnormalities involving independent biological processes. It is also not known which of the candidate biological processes are linked to symptom formation and clinical course, or whether treatment may modify such relationships. Hypotheses have included altered neurotransmission and signal transduction, and abnormalities in neuropeptides and autoimmune

Address for correspondence: J. K. Yao, Ph.D., Neurochemistry and Psychopharmacology Laboratory (Bldg 13), VA Pittsburgh Healthcare System 151U-H, 7180 Highland Drive, Pittsburgh, PA 15206, USA.  
Tel.: +1-412-954-5787 Fax: +1-412-954-5786  
Email: jkyao@pitt.edu

dysfunction (as reviewed by Javitt & Laruelle 2006; Lieberman & Koren 1993; Tandon *et al.* 2008). Evidence from studies of neurotransmitter (dopaminergic, serotonergic, glutamatergic, noradrenergic) systems implicates a number of alterations, but how to interpret these findings has been uncertain due to the important fact that neurotransmitter systems are linked with one another, as well as with signal transduction systems and a diverse range of membrane-bound and cellular systems. Viewing biological processes as integrated systems of genetic, protein, metabolic, cellular, and pathway cascades provides a new paradigm (Clish *et al.* 2004) that has the potential to transform knowledge about the major psychiatric disorders, including schizophrenia and mood disorders (Kaddurah-Daouk *et al.* 2007, 2008, 2009; Yao & Reddy, 2005). This new perspective can increase understanding about how psychiatric disorders are shaped by biological systems that behave in dynamic and interdependent ways. Comprehensive study of one such system, the metabolome, concerns the repertoire of biochemicals present in cells, tissue, and body fluids. Identification of metabolic signatures for pathways of interest can provide enhanced understanding about complex disorders at the molecular level, which is now technically possible through novel high-resolution multidimensional separation and characterization methods.

While the dopamine hypothesis of schizophrenia has retained prominence for over four decades (Carlsson & Lindqvist, 1963; Howes & Kapur, 2009), progress in the field has stimulated alternate views that recognize complex relationships among multiple neurotransmitter systems and include a renewed interest in the importance of serotonin for schizophrenia (Geyer & Vollenweider, 2008). Results from early studies showed that both hyperserotonemia (Garelis *et al.* 1975; Muck-Seler *et al.* 1988; Stahl *et al.* 1983) and serotonin deficiency (Aschcroft *et al.* 1966; Manowitz *et al.* 1973; Reddy *et al.* 2007) were associated with schizophrenia, suggesting a disturbance in central serotonin function. Because serotonin is produced during tryptophan metabolism, these collective findings implicate a dysregulation of tryptophan metabolism for schizophrenia. Tryptophan is catabolized primarily through the kynurenine pathway (Stone, 1993), which is functionally related to the glutamatergic system and neurodegenerative disease. In view of the accumulating evidence that supports an important role for glutamatergic dysfunction in the pathophysiology of schizophrenia (Javitt, 2007; Olney *et al.* 1999; Tamminga, 1998), determining how metabolism within the kynurenine pathway may influence its

clinical profile could advance knowledge about the molecular underpinnings of this severe psychiatric disorder.

Tryptophan is either transaminated to kynurenate, which acts as an endogenous glutamate receptor antagonist, or hydroxylated to 3-hydroxykynurenine (3-OH KY), which is then further degraded to the excitotoxic *N*-methyl-D-aspartate (NMDA) agonist, quinolinate. Kynurenic acid appears to be neuroprotective, while 3-OH KY and quinolinic acid are neurotoxic (Foster *et al.* 1983; Guidetti & Schwarcz, 1999; Stone, 1993). The nature of the influence of kynurenic acid on glutamatergic neurotransmission is generally believed dependent on level or concentration, although the parameters are continuing to be defined. Kynurenic acid at high concentrations acts as a competitive antagonist of the glycine site of NMDA receptors (Stone, 1993), and at low concentrations functions as a non-competitive antagonist of  $\alpha_7$ -nicotinic acetylcholine receptors (Alkondon *et al.* 2004; Hilmas *et al.* 2001). However, even low concentrations of endogenous kynurenic acid have been shown to influence physiological responding reflected in the amplitude of evoked responses in CA1 pyramidal cells (Scharfman *et al.* 2000).

Converging lines of evidence provide support for the recent proposal of kynurenine pathway metabolism as a unique and novel target for the treatment of schizophrenia (Wonodi & Schwarcz, 2010). Increased degradation of tryptophan through the kynurenine pathway has been observed in patients diagnosed with psychotic disorder (Barry *et al.* 2009), and elevated levels of kynurenic acid have been found in cerebrospinal fluid (CSF) of schizophrenia patients at first episode and prior to treatment with antipsychotics (Erhardt *et al.* 2001). Increased levels of kynurenine have also been identified in the post-mortem tissue of schizophrenia patients within Brodmann areas 9 and 19 (Schwarcz *et al.* 2001), brain regions that have been implicated in schizophrenia. Importantly, linkages have been demonstrated between the products of kynurenine pathway and clinical status and cognitive dysfunction. CSF levels of 3-OH KY in unmedicated chronic schizophrenia patients predicted their clinical improvement following 6 wk of treatment with antipsychotic medication (Issa *et al.* 1994). Moreover, findings from animal studies show that kynurenine compounds influence cognitive functions that are known to be disrupted in schizophrenia: 7-chlorokynurenic acid, an NMDA receptor antagonist, reduced acquisition of spatial memory in rats and inhibited induction of long-term potentiation (LTP) in rat hippocampal slices (Watanabe *et al.* 1992); while

elevated level of kynurenic acid in rats reduced spatial working memory performance (Chess *et al.* 2007), and altered sensory processing (Erhardt *et al.* 2004; Shepard *et al.* 2003) and conditioned learning (Chess & Bucci, 2006). As candidate influences for the pathophysiology underlying schizophrenia, the products of tryptophan metabolism may therefore play an important role in the hallmark symptoms of schizophrenia.

Understanding of these molecular processes can be increased using the novel powerful and rapid multi-dimensional separation and characterization method of high-pressure liquid chromatography coupled with electrochemical coulometric array detection (LCECA) (Kristal *et al.* 2007; Mannelli *et al.* 2009; Patkar *et al.* 2009; Rozen *et al.* 2005; Shi *et al.* 2002; Yao & Cheng, 2004), which provides resolving power that is superior to one-dimensional approaches. In an earlier report, our group documented altered interactions of tryptophan metabolites, measured with LCECA, for first-episode neuroleptic-naïve schizophrenia patients at baseline (FENNS-BL) and at 4 wk (FENNS-4w) after initiating treatment with antipsychotic drugs (Yao *et al.* 2010a). Healthy controls and both patient groups (FENNS-BL, FENNS-4w) showed correlations between tryptophan and its metabolites melatonin, kynurenine, 3-OH KY, and tryptamine. However, certain interactions of tryptophan metabolites appeared only in healthy controls. In healthy controls, but in neither of the FENNS groups, serotonin was highly correlated with tryptophan, melatonin, kynurenine, and tryptamine. Also in healthy controls, but in neither of the FENNS groups, 5-hydroxyindoleacetic acid (5-HIAA) was highly correlated with tryptophan, melatonin, kynurenine, and 3-OH KY. In the present report, relationships are detailed between these metabolic signatures of tryptophan-degraded products and clinical symptoms in the same sample of FENNS. The main research questions concerned whether tryptophan metabolites are associated with clinical symptoms in FENNS at baseline when neuroleptic-naïve and drug-free and/or at 4 wk after beginning pharmacological treatment, and, if present, whether these relationships differ significantly between the two time periods. The primary hypothesis concerned the potential influence of kynurenine pathway metabolism on clinical symptomatology. Based on recent empirical and conceptual advances that suggest a coupling of kynurenine metabolism and glutamatergic neurotransmission, kynurenine and its metabolite 3-OH KY were expected to be associated with the cardinal symptoms of schizophrenia, including positive and negative symptoms.

The secondary hypothesis concerned the role of antipsychotic treatment regimen on glutamatergic neurotransmission. Classes of drugs known to reverse NMDA antagonism, and presumably glutamatergic hypofunction, include GABA<sub>A</sub> agonists, muscarinic antagonists, non-NMDA glutamate antagonists, and atypical antipsychotics such as clozapine and olanzapine (Olney *et al.* 1999). The predicted influence of kynurenine pathway on symptom severity and profile was therefore expected to manifest primarily at baseline when patients were unmedicated; treatment with antipsychotics was expected to reduce or eliminate the relationship between kynurenine pathway metabolites and clinical symptoms. As a final consideration, the relative importance of tryptophan metabolism and neurological function for the clinical profile of schizophrenia is unknown. The latter has a demonstrated relationship to psychiatric symptoms and cognition in schizophrenia (Sanders *et al.* 2000, 2004) and to neuroanatomical regions (Keshavan *et al.* 2003) relevant for some of the cognitive deficits associated with this disorder. Tryptophan metabolites and neurological function were expected to exert independent effects on clinical symptoms.

## Methods and materials

### Clinical design

Twenty-five patients were recruited during their first episode of psychosis after they provisionally met DSM-IV criteria for schizophrenia, schizophreniform, or schizoaffective disorder based on the Structured Clinical Interview for DSM Disorders (SCID). Diagnostic assessments and ratings of clinical and neurological symptoms were performed by experienced research clinicians. Initial and follow-up diagnoses were confirmed at diagnostic conferences attended by research faculty and staff, and chaired by an experienced psychiatrist (M.S.K.). Sample characteristics (mean  $\pm$  s.d.) included: age =  $22.6 \pm 7.2$  yr; education =  $12 \pm 3.3$  yr; parental socioeconomic status =  $36.1 \pm 14.3$  (Hollingshead, 1975); weight =  $146.4 \pm 38.4$  lb; height =  $67.3 \pm 3.4$  in.; body mass index =  $22.4 \pm 4.8$ . The ethnicity composition of the sample comprised 15 Caucasian, eight African-American, one Asian Pacific, and one other/unknown. Plasma and clinical data were available at both baseline and 4-wk follow-up for 24 patients. Blood samples were collected and clinical symptoms were evaluated prior to initiation of clinicians' choice of antipsychotic agents. A second set of blood samples and clinical ratings were obtained for the same patients ~4 wk after treatment was initiated.

**Table 1.** Clinical symptom ratings for first-episode schizophrenia patients at baseline and 4 wk

| Clinical symptom                           | Baseline<br>(neuroleptic<br>naive),<br>mean $\pm$ S.D. | 4 wk<br>(medicated),<br>mean $\pm$ S.D. | <i>t</i> <sup>a</sup> | d.f. <sup>a</sup> | <i>p</i> value <sup>b</sup> |
|--------------------------------------------|--------------------------------------------------------|-----------------------------------------|-----------------------|-------------------|-----------------------------|
| BPRS total score                           | 52.58 $\pm$ 8.9                                        | 42.91 $\pm$ 7.5                         | 4.13                  | 23                | <0.001 <sup>b</sup>         |
| BPRS symptom clusters                      |                                                        |                                         |                       |                   |                             |
| Psychosis                                  | 24.46 $\pm$ 4.6                                        | 19.00 $\pm$ 4.5                         | 7.06                  | 23                | <0.001 <sup>b</sup>         |
| Thought disturbance                        | 18.87 $\pm$ 3.7                                        | 14.04 $\pm$ 3.5                         | 5.80                  | 23                | <0.001 <sup>b</sup>         |
| Paranoia                                   | 9.71 $\pm$ 3.2                                         | 7.54 $\pm$ 2.9                          | 4.28                  | 23                | <0.001 <sup>b</sup>         |
| Mood (anxiety-depression)                  | 18.50 $\pm$ 6.2                                        | 14.71 $\pm$ 3.9                         | 2.56                  | 23                | 0.017                       |
| Positive symptoms (SAPS)                   | 24.29 $\pm$ 11.0                                       | 14.21 $\pm$ 12.1                        | 4.91                  | 23                | <0.001 <sup>b</sup>         |
| Negative symptoms (SANS)                   | 45.46 $\pm$ 10.3                                       | 42.17 $\pm$ 8.2                         | 1.48                  | 23                | 0.156                       |
| Neurological symptoms – Total <sup>c</sup> | 6.95 $\pm$ 3.5                                         | 5.35 $\pm$ 2.9                          | 2.31                  | 19                | 0.032                       |

BPRS, Brief Psychiatric Rating Scale; SAPS, Schedule for the Assessment of Positive Symptoms; SANS, Schedule for the Assessment of Negative Symptoms.

<sup>a</sup> *t* test, paired samples; two-tailed; d.f., degrees of freedom.

<sup>b</sup> Bonferroni correction of standard  $\alpha \leq 0.05 \leq 0.00625$ ;  $p \leq 0.10 \leq 0.0125$ .

<sup>c</sup> NES Total Subscale (Sanders *et al.* 2000) from Neurological Evaluation Scale (NES; Buchanan & Heinrichs, 1989).

with one or more of the following antipsychotic drugs: risperidone ( $n=17$ ), olanzapine ( $n=5$ ), quetiapine ( $n=2$ ), aripiprazole ( $n=1$ ), haloperidol ( $n=1$ ). The number equals more than 24 due to polypharmacy. One patient was unmedicated. The mean and S.D. dosage of antipsychotics (chlorpromazine equivalents) (Woods, 2003) was  $221.4 \pm 171.1$  mg/d (median 150, range 100–900). Clinical and neurological symptoms were rated by experienced research clinicians at both time-points using standard rating scales: Brief Psychiatric Rating Scale (BPRS; Overall & Gorham, 1962), Scale for Assessment of Negative Symptoms (SANS) and Scale for Assessment of Positive Symptoms (SAPS; Andreasen, 1983; 1984), Global Assessment Scale (GAS; Endicott *et al.* 1976), Clinical Global Impression (CGI; Guy, 1976), Neurological Evaluation Scale (NES; Buchanan & Heinrichs, 1989). Following a complete description of the study to each individual, written informed consent was obtained in accordance to the study protocol that was approved by the Institutional Review Board at the University of Pittsburgh and the VA Pittsburgh Healthcare System.

#### Laboratory assays

All blood samples were collected in the morning after overnight fasting. Samples were prepared for analysis by extraction in acidified acetonitrile and analysed by LCECA. Complete details of this methodology are provided in Yao *et al.* (2010a,b).

#### Data analyses

Clinical symptom ratings and concentrations of tryptophan metabolites measured from plasma were examined for the first-episode neuroleptic-naïve patients with schizophrenia. The focus of analyses concerned those metabolites that previously showed altered interactions within the tryptophan pathway in this sample of schizophrenia patients, including tryptophan, serotonin, 5-HIAA, melatonin, kynurenine, 3-OH KY, and tryptamine (Yao *et al.* 2010a). All analytes are expressed as ng/ml of plasma. Two groups of clinical ratings and metabolite variables were analysed: 25 FENNS at baseline and 24 of those same patients 4 wk after beginning treatment with antipsychotic drugs ( $n=24$  at 4 wk due to one patient missing some clinical ratings). Descriptive statistics were computed for the 24 patients for whom clinical symptom ratings were available at both time-points (Table 1). For these analyses, individual items from the BPRS were combined to form symptom clusters as follows: Total score (items 1–18); Psychosis (items 4, 7, 8, 10, 11, 12, 14, 15); Mood (items 1, 2, 5, 6, 9, 13). Additional BPRS clusters enabled a more fine-grained examination of psychosis-related symptomatology, including Thought Disturbance (items 4, 8, 11, 12, 15, 18) and Paranoia (items 10, 11, 14). Control of type I error was achieved for these multiple comparisons using Bonferroni correction. Table 2 presents descriptive statistics for the set of tryptophan metabolites included in this report, as well

**Table 2.** Descriptive statistics for metabolites in tryptophan pathway

| Metabolites | HC<br>(n = 30)           | FENNS-BL<br>(n = 25) | FENNS-4w<br>(n = 25) | <i>p</i> values |                    |           |
|-------------|--------------------------|----------------------|----------------------|-----------------|--------------------|-----------|
|             |                          |                      |                      | HC vs. BL       | HC vs. 4w          | BL vs. 4w |
| TRP         | 7628 ± 3043 <sup>a</sup> | 6426 ± 3493          | 5469 ± 2977          | 0.069           | 0.007 <sup>b</sup> | 0.133     |
| 5-HT        | 200 ± 145                | 238 ± 152            | 182 ± 147            | 0.301           | 0.562              | 0.020     |
| 5-HIAA      | 18 ± 11                  | 19 ± 16              | 17 ± 21              | 0.496           | 0.014              | 0.263     |
| MEL         | 1.03 ± 0.44              | 0.80 ± 0.39          | 0.70 ± 0.34          | 0.073           | 0.003 <sup>b</sup> | 0.156     |
| KYN         | 161 ± 86                 | 125 ± 79             | 111 ± 75             | 0.077           | 0.013              | 0.287     |
| 3-OHKY      | 10 ± 8                   | 8.17 ± 8.10          | 7.73 ± 8.75          | 0.176           | 0.071              | 0.751     |
| TRPA        | 19 ± 7                   | 17 ± 9               | 16 ± 6               | 0.144           | 0.175              | 0.791     |

HC, Healthy controls; FENNS, first-episode neuroleptic-naïve patients with schizophrenia; BL, baseline; 4w, 4-wk treatment with antipsychotic drugs; TRP, tryptophan; 5-HT, serotonin; 5-HIAA, 5-hydroxyindoleacetic acid; MEL, melatonin; KYN, kynurenine; 3-OHKY, 3-hydroxykynurenine; TRPA, tryptamine.

<sup>a</sup> Each value (ng/ml) represents mean and standard deviation. All data were adapted from Yao *et al.* (2010a).

<sup>b</sup> Because the parametric assumptions for the Student's *t* test are not met, a non-parametric test, the Wilcoxon Rank Sum test was used to compare the locations of samples from disparate groups, and the Wilcoxon Signed Rank test was done to compare paired samples (i.e. BL vs. 4w). Significant difference after Bonferroni correction of an  $\alpha$  of 0.05–0.0038, or 0.10–0.0077.

as *p* values from the tests of differences between baseline and 4 wk for patients, and between the age-matched healthy volunteers and patients at each time-point (data adapted from Yao *et al.* 2010a).

The relationship between analytes within the tryptophan pathway and clinical symptom ratings was examined for both time-points. Most of the analytes within the tryptophan pathway and the clinical symptom ratings either were, or were able to be transformed to, approximate univariate and multivariate normality using natural log (ln), square root (sqrt), quartic root, negative inverse, negative inverse square root, and/or negative inverse quartic root transformations.

A correlation test (Johnson & Wichern, 1998) and Henze & Zirkler's test (1990) were used to assess approximate univariate and multivariate normality, respectively, requiring  $p < 0.10$  for rejection of normality. Following normality determination and, if necessary, transformations, both groupings of data had the hypothesis of complete independence of all metabolite and clinical symptom variables tested, and each hypothesis was rejected with  $p < 10^{-8}$ .

Simultaneous tests of the hypotheses that multiple correlation coefficients were equal to zero were computed separately for the data at baseline and for the data at 4 wk (Drton & Perlman, 2004). Simultaneous tests of the hypotheses that correlations at baseline and at 4 wk were equal were additionally computed using the Larntz & Perlman (1988) procedure to screen for any baseline to 4-wk between-group correlation differences. Both methods use Šidák simultaneous confidence intervals (or *p* values) to correct for multiple tests.

*p* value results obtained from the Drton & Perlman (2004) and the Larntz & Perlman (1988) procedures were additionally verified by Monte Carlo simulation using 10 000 randomly generated datasets. The test statistics and Monte Carlo *p* values did not differ greatly, but the Monte Carlo *p* values were considered to be more accurate. Significant effects were confirmed using a repeated-measures model to estimate clinical symptom(s) under different levels of metabolite at each time-point.

Finally, any significant relationship obtained between metabolite and clinical symptom based on the above procedures was examined further using linear regression analysis. Included in this approach was an evaluation of the relative contributions of metabolite(s) showing a significant relation to clinical symptoms and of neurological symptoms that have a demonstrated relationship to clinical symptoms, cognitive performance, and neuroanatomical regions of interest for schizophrenia. The model included metabolite and neurological symptoms [total score for the modified 13-item version of the NES (Buchanan & Heinrichs, 1989) from Sanders *et al.* (2000)] as independent or predictor factors using a forward selection procedure. The joint (or interaction) effects of these two variable classes were also examined, as well as the effects of control variables (age, education, body mass index). Collinearity was evaluated using correlation coefficients for the predictor or independent variables and tests of tolerance, variance inflation factor, and condition indices (Pedhazur, 1997). Unstandardized betas are reported. Bonferroni correction was used to control type I error.

**Table 3.** Within-group correlation coefficients for tryptophan metabolites and clinical symptoms for first-episode schizophrenia patients (tests for zero correlation, two-sided)

| Clinical symptoms                   | Tryptophan metabolites |        |        |        |        |                     |        |
|-------------------------------------|------------------------|--------|--------|--------|--------|---------------------|--------|
|                                     | TRP                    | 5-HT   | 5-HIAA | MEL    | KYN    | 3-OHKY              | TRPA   |
| <b>Baseline (neuroleptic-naive)</b> |                        |        |        |        |        |                     |        |
| BPRS                                |                        |        |        |        |        |                     |        |
| Total                               | −0.234                 | −0.090 | −0.306 | −0.186 | −0.384 | −0.618 <sup>a</sup> | −0.369 |
| Psychosis                           | −0.195                 | 0.049  | −0.107 | −0.233 | −0.283 | −0.339              | −0.221 |
| Thought disturbance                 | −0.136                 | 0.184  | −0.165 | −0.291 | −0.308 | −0.387              | −0.261 |
| Paranoia                            | −0.094                 | −0.129 | −0.006 | 0.027  | −0.042 | −0.088              | −0.096 |
| Anxious depression                  | 0.082                  | −0.204 | −0.279 | 0.136  | −0.016 | −0.331              | −0.076 |
| SAPS – Total                        | −0.229                 | −0.143 | −0.317 | −0.235 | −0.276 | −0.387              | −0.111 |
| SANS – Total                        | −0.035                 | −0.019 | −0.342 | −0.121 | −0.163 | −0.129              | −0.072 |
| <b>4 wk (medicated)</b>             |                        |        |        |        |        |                     |        |
| BPRS                                |                        |        |        |        |        |                     |        |
| Total                               | 0.022                  | 0.164  | −0.020 | 0.044  | 0.259  | 0.413               | 0.163  |
| Psychosis                           | −0.120                 | 0.070  | −0.075 | 0.052  | 0.165  | 0.302               | 0.100  |
| Thought disturbance                 | −0.022                 | 0.166  | −0.019 | 0.119  | 0.220  | 0.409               | 0.207  |
| Paranoia                            | −0.003                 | 0.120  | −0.062 | 0.171  | 0.245  | 0.278               | 0.093  |
| Anxious depression                  | 0.019                  | −0.086 | 0.070  | −0.079 | 0.271  | 0.403               | 0.189  |
| SAPS – Total                        | −0.098                 | 0.129  | −0.020 | −0.063 | 0.056  | 0.235               | 0.110  |
| SANS – Total                        | 0.063                  | 0.175  | −0.207 | 0.118  | −0.011 | 0.060               | 0.204  |

TRP, Tryptophan; 5-HT, serotonin; 5-HIAA, 5-hydroxyindoleacetic acid; MEL, melatonin; KYN, kynurenine; 3-OHKY, 3-hydroxykynurenine; TRPA, tryptamine; BPRS, Brief Psychiatric Rating Scale; SAPS, Schedule for the Assessment of Positive Symptoms; SANS, Schedule for the Assessment of Negative Symptoms.

<sup>a</sup> Drton–Perlman simultaneous *p* values, significant at *p* < 0.05 and trend significant at *p* < 0.10.

## Results

Most clinical symptom scores improved significantly from baseline levels after following initiation of treatment with antipsychotic drugs (Table 1). Exceptions were the mood and negative symptom scores, and the total neurological symptoms score. Within-group correlations for tryptophan pathway metabolites and clinical symptoms for FENNS at baseline and 4-wk follow-up are provided in Table 3. Figure 1 presents the correlation obtained between 3-OHKY and overall clinical symptoms (BPRS total score) for patients (*n* = 25) at baseline (*r* = −0.62, *p* = 0.086), when they were neuroleptic-naive and drug-free during their first psychotic episode, and the correlation obtained for these two factors at 4 wk after patients (*n* = 24) began treatment (*r* = 0.41, *p* = 0.98). The difference between these correlations obtained at baseline and at 4 wk was highly significant statistically (*p* = 0.009, Larntz–Perlman procedure). The direction of the relationship observed at baseline indicates that higher plasma levels of 3-OHKY at baseline were associated with lower total clinical symptom scores at baseline. This

result is supported by the repeated-measures model for BPRS at different levels of 3-OHKY and time-point [Hotelling's trace:  $F_{1,46} = 7.57$ , *p* = 0.008; mean *z* score difference between baseline and 4 wk: −1.06, 95% CI (Šidák adjustment) −1.836 to −0.285].

The relationship between baseline 3-OHKY and baseline clinical symptoms was examined further using linear regression analysis. The model included 3-OHKY and neurological symptoms as independent or predictor variables, and clinical symptoms as the dependent factors. The two predictor variables were not significantly correlated (Pearson's *r* = −0.37, *p* = 0.091), and results of collinearity tests were within acceptable limits for each regression equation (see Methods section). Table 4a shows the results for this model for the dependent measures of total, psychosis, and mood symptoms. The model accounted for 38% of the variance (adjusted *R*<sup>2</sup>) associated with patients' score for total symptoms, 44% of the variance associated with their score for psychosis symptoms, and 53% of the variance associated with their score for mood symptoms. The only significant predictor of total symptom score was 3-OHKY, which showed that

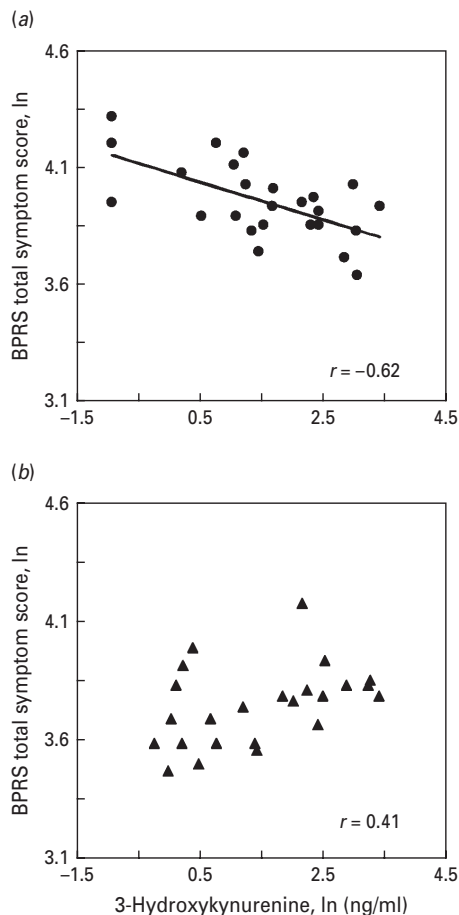

**Fig. 1.** Association between 3-hydroxykynurenine (ln) and clinical symptoms (ln) in first-episode neuroleptic-naive schizophrenia (FENNS) patients. (a) FENNS patients at baseline; (b) FENNS patients after 4-wk antipsychotic treatment. The between-group correlation difference was significant at  $p = 0.009$  (Monte Carlo simulation 10 000 randomly generated datasets). The correlation coefficients ( $r$ ) and simultaneous  $p$  values were calculated according to the Larntz-Perlman procedure (Larntz & Perlman 1988). ln, natural log.

higher plasma levels of this metabolite were associated with lower total clinical symptom scores. Interestingly, the only significant predictor of psychosis symptoms was the neurological symptoms factor, and the direction of this relationship indicated increases in patients' neurological symptoms to be associated with increases in their psychosis symptoms. In contrast, both 3-OH KY and neurological symptoms were significant predictors of patients' mood symptom score. The directions of these relationships show that increases in metabolite concentration and neurological symptoms were associated with decreases in symptoms of anxiety and depression.

The same set of predictors measured at baseline was tested for prediction of clinical improvement at 4 wk. Baseline 3-OH KY and neurological symptoms were entered as the independent or predictor variables. Table 4b shows the results for clinical outcome reflected in the change in total, psychosis, and mood symptoms at 4 wk (e.g. change score for total symptoms = total symptoms at baseline *minus* total symptoms at 4 wk). The model was successful in accounting for 41% of the variance associated with the change in total symptoms, 35% of the variance associated with change in psychosis symptoms, and 38% of the variance associated with change in mood symptoms. In contrast to the results for baseline predictors of baseline clinical symptoms, 3-OH KY at baseline was the only significant predictor of clinical improvement at 4 wk. As shown in Fig. 2, the direction of these relationships indicates that lower plasma levels of 3-OH KY at baseline predicted greater improvement in total, psychosis, and mood symptoms at 4 wk.

In addition to the main-effects model of baseline 3-OH KY and neurological symptoms as independent or predictor factors of clinical symptomatology, the joint effects of these two variables (3-OH KY  $\times$  neurological symptoms interaction) were also examined. This interaction term was not a significant predictor of total, psychosis, or mood symptoms at baseline or of clinical improvement at 4 wk (all  $p$  values = n.s.). Moreover, none of the control variables (age, education, body mass index) were significant predictors of clinical symptomatology, either at baseline or for clinical change at 4 wk, and inclusion of these factors did not alter any of the results based on the primary model (all  $p$  values = n.s.).

## Discussion

Level of 3-OH KY, a neurotoxic byproduct of tryptophan degradation, was associated with overall level of clinical symptoms when first-episode schizophrenia patients were unmedicated and neuroleptic-naive. The source of this relationship appears to have been patients' symptoms of mood; baseline psychotic symptoms were predicted only by neurological symptoms. Importantly, baseline level of 3-OH KY predicted clinical improvement at 4 wk after beginning treatment, with the lowest concentrations of 3-OH KY associated with the greatest degrees of symptom improvement. Again, this effect appeared strongest for change in mood symptoms.

It is important to view the relationship between 3-OH KY and clinical symptoms for these first-episode patients within the larger context of their clinical

**Table 4.** 3-Hydroxykynurenine (3-OH KY) and neurological symptoms predict clinical symptoms for first-episode schizophrenia patients

|                                                                                                        | <i>R</i> | Adj. <i>R</i> <sup>2</sup> | <i>F</i> ratio | d.f.  | <i>p</i> ≤         | <i>β</i> | S.E. <i>β</i> | <i>t</i> test | <i>p</i> ≤         | 95% CI            |
|--------------------------------------------------------------------------------------------------------|----------|----------------------------|----------------|-------|--------------------|----------|---------------|---------------|--------------------|-------------------|
| <b>(a) Baseline metabolite and neurological factors predict baseline clinical symptoms<sup>a</sup></b> |          |                            |                |       |                    |          |               |               |                    |                   |
| (1) BPRS Total symptoms                                                                                | 0.64     | 0.38                       | 14.17          | 1, 20 | 0.001 <sup>b</sup> |          |               |               |                    |                   |
| 3-OH KY                                                                                                |          |                            |                |       |                    | −4.418   | 1.174         | −3.76         | 0.001 <sup>b</sup> | −6.866 to −1.97   |
| (2) BPRS Psychosis symptoms                                                                            | 0.68     | 0.44                       | 17.66          | 1, 20 | 0.001 <sup>b</sup> |          |               |               |                    |                   |
| Neurological symptoms, Total                                                                           |          |                            |                |       |                    | 5.849    | 1.392         | 4.20          | 0.001 <sup>b</sup> | 2.946 to 8.753    |
| (3) BPRS Mood symptoms                                                                                 | 0.76     | 0.53                       | 12.78          | 2, 19 | 0.001 <sup>b</sup> |          |               |               |                    |                   |
| 3-OH KY                                                                                                |          |                            |                |       |                    | −3.319   | 0.746         | −4.45         | 0.001 <sup>b</sup> | −4.880 to −1.758  |
| Neurological symptoms, Total                                                                           |          |                            |                |       |                    | −7.318   | 2.191         | −3.34         | 0.003 <sup>b</sup> | −11.904 to −2.733 |
| <b>(b) Baseline metabolite predicts clinical change at 4 wk</b>                                        |          |                            |                |       |                    |          |               |               |                    |                   |
| (1) BPRS Total symptom change                                                                          | 0.66     | 0.41                       | 15.68          | 1, 20 | 0.001 <sup>b</sup> |          |               |               |                    |                   |
| 3-OH KY                                                                                                |          |                            |                |       |                    | −0.733   | 0.185         | −3.96         | 0.001 <sup>b</sup> | −1.120 to −0.347  |
| (2) BPRS Psychosis symptom change                                                                      | 0.62     | 0.35                       | 12.58          | 1, 20 | 0.002 <sup>b</sup> |          |               |               |                    |                   |
| 3-OH KY                                                                                                |          |                            |                |       |                    | −0.252   | 0.071         | −3.55         | 0.002 <sup>b</sup> | −0.401 to −0.104  |
| (3) BPRS Mood symptom change                                                                           | 0.64     | 0.38                       | 14.15          | 1, 20 | 0.001 <sup>b</sup> |          |               |               |                    |                   |
| 3-OH KY                                                                                                |          |                            |                |       |                    | −0.502   | 0.134         | −3.76         | 0.001 <sup>b</sup> | −0.781 to −0.224  |

*R*, Multiple correlation coefficient; *F* ratio, test of significance of *R*; d.f., degrees of freedom; *β*, regression coefficient or slope; S.E., standard error; CI, confidence interval for regression coefficient; BPRS, Brief Psychiatric Rating Scale.

<sup>a</sup> Predictors: 3-hydroxykynurenine and neurological symptoms – Total.

<sup>b</sup> Bonferroni correction of standard  $\alpha \leq 0.05 \leq 0.0083$ ;  $p \leq 0.10 \leq 0.016$ .

status and tryptophan metabolism at the baseline and 1-month time-points. First, these patients showed significant clinical improvement after 4 wk of treatment with antipsychotic drugs. Improvement occurred primarily in the domain of positive symptoms, including symptoms of psychosis, thought disturbance, and paranoia. Changes in mood, negative, and neurological symptoms did not reach statistical significance. Regarding the latter, however, it is possible that the conservative nature of our correction against type I error may be concealing real improvement in these clinical domains. In contrast, their absolute levels of tryptophan metabolites in plasma did not differ significantly between the assessments at baseline and 4 wk, nor did the levels of kynurenine and its metabolic compounds differ between healthy volunteers and patients at either time-point (reported in Yao *et al.* 2010a). Second, both patients and healthy controls showed highly significant correlations between tryptophan and kynurenine, 3-OH KY, and tryptamine, which is suggestive of tight control over relative metabolite ratios along the tryptophan pathways (Yao *et al.* 2010a). The findings for 3-OH KY revealed in the present report may therefore be due to effects outside the stream of metabolic linkages within the kynurenine pathway, with a strong candidate being the known influence of kynurenine compounds on the glutamatergic system (for details see Introduction). An

additional, potentially important implication of the present data is that 3-OH KY and its downstream effects may influence the degree of clinical improvement that can be achieved through brief treatment with pharmacological agents.

Alterations in cortical kynurenic acid have been reported for schizophrenia, and, although plasma kynurenic acid was not examined in the present study, the relationship observed between 3-OH KY and clinical symptoms is generally consistent with those previously reported alterations. Importantly, the directions of the relationships obtained between metabolite and psychological disturbance suggest this relationship is not straightforward. Baseline concentration of metabolite was inversely related to baseline clinical symptoms, with lower concentrations of 3-OH KY associated with greater psychological disturbance when patients were unmedicated and neuroleptic-naïve. In contrast, baseline level of metabolite showed the opposite relationship to clinical improvement at 4 wk, with lower baseline concentrations of 3-OH KY predicting greater improvement in patients' clinical symptoms 1 month after beginning treatment with antipsychotics. As noted, patients did not differ from controls for absolute levels of tryptophan, kynurenine, or 3-OH KY at either time-point, and all groups were characterized by a tight coupling between tryptophan and kynurenine and between tryptophan



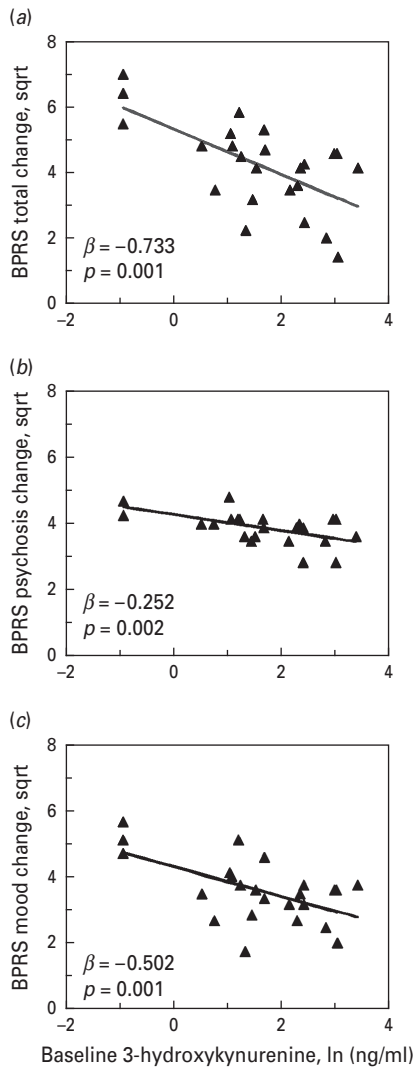

**Fig. 2.** Baseline 3-hydroxykynurenine (3-OHKY) (ln) predicts clinical change at 4 wk for (a) total symptoms (sqrt); (b) psychosis symptoms (sqrt); (c) mood symptoms (sqrt). The regression coefficient or slope ( $\beta$ ) and  $p$  values were calculated by multiple regression analyses. ln, natural log; sqrt, square root.

and 3-OHKY (Yao *et al.* 2010a). Thus, the pattern in the present data cannot be accounted for by elevated levels of kynurenine metabolites, or by alterations in metabolic linkages along this pathway.

One mechanism that may account for the pattern of associations that was observed in the present study concerns the relationship between tryptophan catabolism and transmitter dynamics, including the previously mentioned modulatory action of kynurenic acid on glutamatergic transmission. Moreover, the indication in the present data that antipsychotic agents modify these dynamics receives support from recent

work. First, Issa *et al.* (1994) found an association between the amount of change in CSF 3-OHKY and change in clinical symptoms following 6 wk of treatment with haloperidol in unmedicated chronic schizophrenia patients who were judged to be treatment resistant. Second, Schwieler *et al.* (2008) administered clozapine to rodents, which increased activation of dopamine neurons in the ventral tegmental area (VTA). However, pretreatment with agents that either produced elevated or decreased brain levels of kynurenic acid resulted in inhibition or potentiation, respectively, of the excitatory effect of clozapine on dopamine neurons in VTA. The kynurenine pathway may therefore influence dopaminergic as well as glutamatergic transmission.

The relationship between tryptophan metabolism and clinical symptoms appeared strongest for mood symptoms in this sample of first-episode patients. Due to the growing understanding that symptoms of depression are present even in the prodrome as well as during the first episode of schizophrenia (Häfner *et al.* 2005; Iyer *et al.* 2008; Owens *et al.* 2005; Romm *et al.* 2010), this metabolite-clinical symptom linkage has implications for early identification and intervention strategies. In contrast, symptoms of psychosis in these patients showed a different pattern at baseline and 4 wk; baseline neurological symptoms predicted baseline psychosis symptoms, while baseline metabolites predicted change in psychosis symptoms at 4 wk. This former relationship, which showed increases in neurological symptoms to be associated with increases in psychotic symptoms, is generally consistent with earlier findings for unmedicated chronic patients (Mittal *et al.* 2007; Sanders *et al.* 2000).

In summary, biochemical-clinical relationships were examined for first-episode schizophrenia patients at baseline when they were unmedicated and neuroleptic-naïve, and again at 1 month after beginning treatment. Key biochemical variables within the tryptophan metabolic pathway and clinical symptoms relevant to schizophrenia were targeted. Results suggest this metabolic pathway may play a role in clinical presentation and outcome during the early course of schizophrenia illness.

### Acknowledgements

This material is based on work supported by grants from the Department of Veterans Affairs, Veterans Health Administration, Office of Research and Development, Biomedical Laboratory R & D [Merit Reviews (J.K.Y.) and Senior Research Career Scientist Award (J.K.Y.)], VA Pittsburgh Healthcare System

(J.K.Y., G.G.D., R.D.R.), National Institute of Mental Health [MH58141 (J.K.Y.), MH64118 (R.D.R.), MH45203 (M.S.K), and MH84941 (R.K.D.)], National Institute of General Medical Sciences [R24 GM078233 (R.K.D.)]. The authors are grateful to Dr Nina Schooler and Dr Cameron Carter, and the clinical core staff of the Center for the Neuroscience of Mental Disorders (MH45156, David Lewis, M.D., Director) for their assistance in diagnostic and psychopathological assessments, and to P. Cheng, C. Korbanic and J. Haflett for their technical assistance. The funders had no role in study design, data collection and analysis, decision to publish, or preparation of the manuscript. The contents of this article do not represent the views of the Department of Veterans Affairs or the United States Government.

### Statement of Interest

Dr McEvoy received honoraria from Lilly, and grant support from GlaxoSmithKline, Pfizer and Daiichi Sankyo Pharmaceuticals America. Dr Kaddurah-Daouk is an equity holder in Metabolon Inc., a biotechnology company in the metabolomics domain, and also holds patent in this field.

### References

- Alkondon M, Pereira EFR, Yu P, Arruda EZ, *et al.* (2004). Targeted deletion of the kynurenine aminotransferase II gene reveals a critical role of endogenous kynurenic acid in the regulation of synaptic transmission via  $\alpha 7$  nicotinic receptors in the hippocampus. *Journal of Neuroscience* **24**, 4635–4648.
- Andreasen NC (1983). *Scale for the Assessment of Negative Symptoms (SANS)*. Iowa City, IA: University of Iowa.
- Andreasen NC (1984). *Scale for the Assessment of Positive Symptoms (SAPS)*. Iowa City, IA: University of Iowa.
- Aschcroft GW, Crawford TBB, Eccleston D, Sharman DE, *et al.* (1966). 5-Hydroxyindole compounds in the cerebrospinal fluid of patients with psychiatric or neurological disease. *Lancet* **2**, 1049–1052.
- Barry S, Clarke G, Scully P, Dinan TG (2009). Kynurenine pathway in psychosis: evidence of increased tryptophan degradation. *Journal of Psychopharmacology* **23**, 287–294.
- Buchanan RW, Heinrichs DW (1989). The Neurological Evaluation Scale (NES): a structured instrument for the assessment of neurological signs in schizophrenia. *Psychiatry Research* **27**, 335–350.
- Carlsson A, Lindqvist M (1963). Effect of chlorpromazine or haloperidol on the formation of 3-methoxytyramine and mormetanephine in mouse brain. *Acta Pharmacologica et Toxicologica (Copenhagen)* **20**, 140–144.
- Chess AC, Bucci DJ (2006). Increased concentration of cerebral kynurenic acid alters stimulus processing and conditioned responding. *Behavioural Brain Research* **170**, 326–332.
- Chess AC, Simoni MK, Alling TE, Bucci DJ (2007). Elevations of endogenous kynurenic acid produce spatial working memory deficits. *Schizophrenia Bulletin* **33**, 797–804.
- Clish CB, Davidov E, Oresic M, Plasterer TN, *et al.* (2004). Integrative biological analysis of the APOE\*3-leiden transgenic mouse. *OMICS* **8**, 3–13.
- Drton M, Perlman MD (2004). Model selection for Gaussian concentration graphs. *Biometrika* **91**, 591–602.
- Endicott J, Spitzer RL, Fleiss JL, Cohen J (1976). The global assessment scale. A procedure for measuring overall severity of psychiatric disturbance. *Archives of General Psychiatry* **33**, 766–771.
- Erhardt S, Blennow K, Nordin C, Skogh E, *et al.* (2001). Kynurenic acid levels are elevated in the cerebrospinal fluid of patients with schizophrenia. *Neuroscience Letters* **313**, 96–98.
- Erhardt S, Schwieler L, Emanuelsson C, Geyer M (2004). Endogenous kynurenic acid disrupts prepulse inhibition. *Biological Psychiatry* **56**, 255–260.
- Foster AC, Collins JF, Schwarcz R (1983). On the excitotoxic properties of quinolinic acid, 2,3-piperidine dicarboxylic acids and structurally related compounds. *Neuropharmacology* **22**, 1331–1342.
- Garelis E, Gillin J, Wyatt R, Neff N (1975). Elevated blood serotonin concentration in unmedicated chronic schizophrenic patients. *American Journal of Psychiatry* **132**, 184–186.
- Geyer MA, Vollenweider FX (2008). Serotonin research: contributions to understanding psychoses. *Trends in Pharmacological Science* **29**, 445–453.
- Guidetti P, Schwarcz R (1999). 3-Hydroxykynurenine potentiates quinolinate but not NMDA toxicity in the rat striatum. *European Journal of Neuroscience* **11**, 3857–3863.
- Guy W (1976). Clinical global impressions. In: *ECDEU Assessment Manual for Psychopharmacology* (Revised) (pp. 217–221). Rockville: National Institute of Mental Health.
- Häfner H, Maurer K, Trendler G, an der Heiden W, *et al.* (2005). Schizophrenia and depression: challenging the paradigm of two separate diseases – a controlled study of schizophrenia, depression and healthy controls. *Schizophrenia Research* **77**, 11–24.
- Henze N, Zirkler B (1990). A class of invariant consistent tests for multivariate normality. *Communications in Statistics – Theory and Methods* **19**, 3595–3617.
- Hilmas C, Pereira EFR, Alkondon M, Rassoulpour A, *et al.* (2001). The brain metabolite kynurenic acid inhibits  $\alpha 7$  nicotinic receptor activity and increases non- $\alpha 7$  nicotinic receptor expression: physiopathological implications. *Journal of Neuroscience* **21**, 7463–7473.
- Hollingshead A (1975). *Four Factor Index of Social Status*. New Haven: Department of Sociology, Yale University.
- Howes OD, Kapur S (2009). The dopamine hypothesis of schizophrenia: Version III – the final common pathway. *Schizophrenia Bulletin* **35**, 549–562.

- Issa F, Kirch DG, Gerhardt GA, Bartko JJ, et al.** (1994). A multidimensional approach to analysis of cerebrospinal fluid biogenic amines in schizophrenia: II. Correlations with psychopathology. *Psychiatry Research* **52**, 251–258.
- Iyer SN, Boekestyn L, Cassidy CM, King S, et al.** (2008). Signs and symptoms in the pre-psychotic phase: description and implications for diagnostic trajectories. *Psychological Medicine* **38**, 1147–1156.
- Javitt DC** (2007). Glutamate and schizophrenia: phencyclidine, N-methyl-D-aspartate receptors, and dopamine-glutamate interactions. *International Review of Neurobiology* **78**, 69–108.
- Javitt DC, Laruelle M** (2006). Neurochemical theories. In: Lieberman JA, Stroup TS, Perkins DO (Eds), *Textbook of Schizophrenia* (pp. 85–116). Washington, DC: American Psychiatric Publishing.
- Johnson RA, Wichern DS** (1998). *Applied Multivariate Statistical Analysis* (4th edn). Upper Saddle River: Prentice Hall.
- Kaddurah-Daouk R, Krishnan KR** (2009). Metabolomics: a global biochemical approach to the study of central nervous system diseases. *Neuropsychopharmacology* **34**, 173–186.
- Kaddurah-Daouk R, Kristal BS, Weinshilboum RM** (2008). Metabolomics: a global biochemical approach to drug response and disease. *Annual Review of Pharmacology and Toxicology* **48**, 653–683.
- Kaddurah-Daouk R, McEvoy J, Baillie RA, Lee D, et al.** (2007). Metabolomic mapping of atypical antipsychotic effects in schizophrenia. *Molecular Psychiatry* **12**, 934–945.
- Keshavan MS, Sanders RD, Sweeney JA, Diwadkar VA, et al.** (2003). Diagnostic specificity and neuroanatomical validity of neurological abnormalities in first-episode psychoses. *American Journal of Psychiatry* **160**, 1298–1304.
- Kristal BS, Shurubor YI, Kaddurah-Daouk R, Matson WR** (2007). Metabolomics in the study of aging and caloric restriction. *Methods in Molecular Biology* **371**, 393–409.
- Larntz K, Perlman MD** (1988). A simple test for the equality of correlation matrices. In: Gupta SS, Berger JO (Eds), *Statistical Decision Theory and Related Topics IV*, vol. 2 (pp. 289–298). New York: Springer.
- Lieberman JA, Koreen AR** (1993). Neurochemistry and neuroendocrinology of schizophrenia, a selective review. *Schizophrenia Bulletin* **19**, 371–429.
- Mannelli P, Patkar A, Rozen S, Matson W, et al.** (2009). Opioid use affects antioxidant activity and purine metabolism: preliminary results. *Human Psychopharmacology* **24**, 666–675.
- Manowitz P, Gilmour DG, Racevskis J** (1973). Low plasma tryptophan levels in recently hospitalized schizophrenics. *Biological Psychiatry* **6**, 109–118.
- Mittal VA, Hasenkamp W, Sanfilipo M, Wieland S, et al.** (2007). Relation of neurological soft signs to psychiatric symptoms in schizophrenia. *Schizophrenia Research* **94**, 37–44.
- Muck-Seler D, Jakovlievie M, Deanovie Z** (1988). Time course of schizophrenia and platelet 5-HT level. *Biological Psychiatry* **23**, 243–251.
- Olney JW, Newcomer JW, Farber NB** (1999). NMDA receptor hypofunction model of schizophrenia. *Journal of Psychiatric Research* **33**, 523–533.
- Overall JE, Gorham DR** (1962). The Brief Psychiatric Rating Scale. *Psychological Reports* **10**, 799–812.
- Owens DGC, Miller P, Lawrie SM, Johnstone EC** (2005). Pathogenesis of schizophrenia: a psychopathological perspective. *British Journal of Psychiatry* **186**, 386–393.
- Patkar AA, Rozen S, Mannelli P, Matson W, et al.** (2009). Alterations in tryptophan and purine metabolism in cocaine addiction: a metabolomic study. *Psychopharmacology* **206**, 479–489.
- Pedhazur EJ** (1997). *Multiple Regression in Behavioral Research* (3rd edn). Belmont: Wadsworth.
- Reddy R, Keshavan M, Yao JK** (2007). Blunted serotonergic responsivity in neuroleptic-naïve patients at first-episode of schizophrenia. *Schizophrenia Research* **90**, 81–85.
- Romm KL, Rossberg JI, Berg AO, Barrett EA, et al.** (2010). Depression and depressive symptoms in first episode psychosis. *Journal of Nervous and Mental Disease* **198**, 67–71.
- Rozen S, Cudkowicz ME, Bogdanov M, Matson WR, et al.** (2005). Metabolomic analysis and signatures in motor neuron disease. *Metabolomics* **1**, 101–108.
- Sanders RD, Keshavan MS, Forman SD, Pieri JN, et al.** (2000). Factor structure of neurological examination abnormalities in unmedicated schizophrenia. *Psychiatry Research* **95**, 237–243.
- Sanders RD, Schuepbach D, Goldstein G, Haas GL, et al.** (2004). Relationships between cognitive and neurological performance in neuroleptic-naïve psychosis. *Journal of Neuropsychiatry and Clinical Neurosciences* **16**, 480–487.
- Scharfman HE, Goodman JH, Schwarcz R** (2000). Electrophysiological effects of exogenous and endogenous kynurenic acid in the rat brain: studies *in vivo* and *in vitro*. *Amino Acids* **19**, 283–297.
- Schwarcz R, Rassoulpour A, Wu H-Q, Medoff D, et al.** (2001). Increased cortical kynurenate content in schizophrenia. *Biological Psychiatry* **50**, 521–530.
- Schwieler L, Linderholm KR, Nilsson-Todd LK, Erhardt S, et al.** (2008). Clozapine interacts with the glycine site of the NMDA receptor: electrophysiological studies of dopamine neurons in the rat ventral tegmental area. *Life Sciences* **83**, 170–175.
- Shepard PD, Joy B, Clerkin L, Schwarcz R** (2003). Micromolar brain levels of kynurenic acid are associated with a disruption in auditory sensory gating in the rat. *Neuropsychopharmacology* **28**, 1454–1462.
- Shi H, Vigneau-Callahan KE, Matson WR, Kristal BS** (2002). Attention to relative response across sequential electrodes improves quantitation of coulometric array. *Analytical Biochemistry* **302**, 239–245.
- Stahl SM, Wood DJ, Mefford IN, Berger PA, et al.** (1983). Hyperserotonemia and platelet serotonin uptake and release in schizophrenia and affective disorders. *American Journal of Psychiatry* **140**, 26–30.
- Stone TW** (1993). Neuropharmacology of quinolinic and kynurenic acids. *Pharmacological Reviews* **45**, 309–379.

- Tamminga CA** (1998). Schizophrenia and glutamatergic transmission. *Critical Review Neurobiology* **12**, 21–36.
- Tandon R, Keshavan MS, Nasrallah HA** (2008). Schizophrenia, 'Just the facts': what we know in 2008. Part 1: overview. *Schizophrenia Research* **100**, 4–19.
- Watanabe Y, Himi T, Saito H, Abe K** (1992). Involvement of glycine site associated with NMDA receptor in hippocampal long-term potentiation and acquisition of spatial memory in rats. *Brain Research* **582**, 58–64.
- Wonodi I, Schwarcz R** (2010). Cortical kynurenine pathway metabolism: a novel target for cognitive enhancement in schizophrenia. *Schizophrenia Bulletin* **36**, 211–218.
- Woods SW** (2003). Chlorpromazine equivalent doses for the newer atypical antipsychotics. *Journal of Clinical Psychiatry* **64**, 663–667.
- Yao JK, Cheng P** (2004). Determination of multiple redox-active compounds by high-performance liquid chromatography with coulometric multi-electrode array system. *Journal of Chromatography B* **810**, 93–100.
- Yao JK, Dougherty Jr. GG, Reddy RD, Keshavan MS, et al.** (2010a). Altered interactions of tryptophan metabolites in first-episode neuroleptic-naive patients with schizophrenia. *Molecular Psychiatry* **15**, 938–953.
- Yao JK, Dougherty Jr. GG, Reddy RD, Keshavan MS, et al.** (2010b). Homeostatic imbalance of purine catabolism in first-episode neuroleptic-naive patients with schizophrenia. *PLoS One* **5**, e9508.
- Yao JK, Reddy RD** (2005). Metabolic investigation in psychiatric disorders. *Molecular Neurobiology* **31**, 193–203.
